# Supplementary material
Source: Springer Nature journal article supplement (http://publikationen.ub.uni-frankfurt.de/files/35269/13104_2014_3224_MOESM1_ESM.pdf)
Supplement: MOESM1 [file 13104_2014_3224_MOESM1_ESM.pdf]

# Suppl. Figure 1

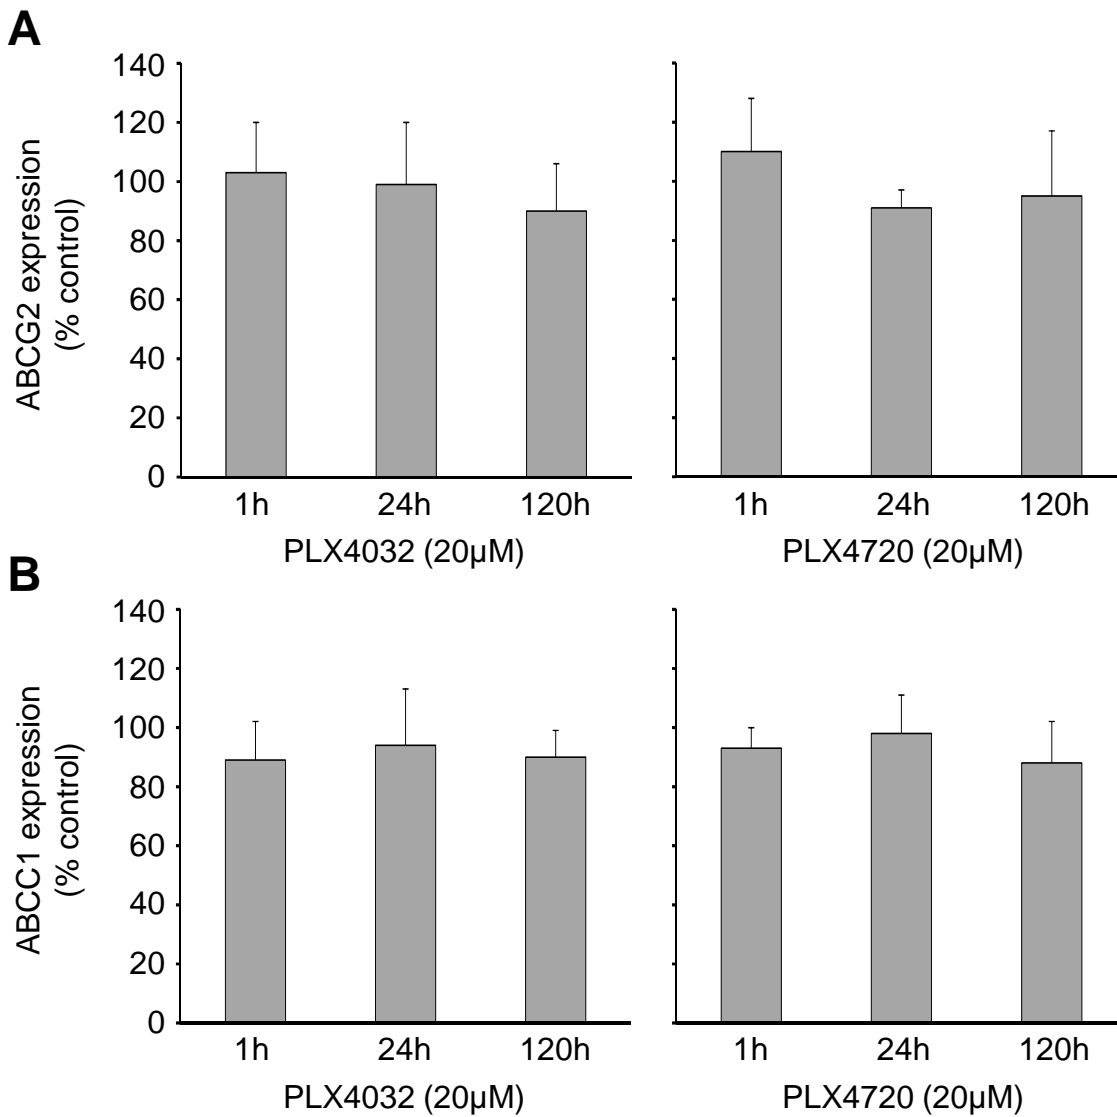

**Suppl. Table 1.** Effects of PLX4032 and PLX4720 on ABCG2 and ABCC1 expression. A) ABCG2 expression in UKF-NB-3<sup>ABCG2</sup> cells after treatment with PLX4032 or PLX4720 for different incubation periods in % relative to non-treated control as determined by flow cytometry; B) ABCC1 expression in G62 cells after treatment with PLX4032 or PLX4720 for different incubation periods in % relative to non-treated control as determined by flow cytometry.
